# Supplementary material for: Impact of Copolymer Architecture on Demicellization and Cargo Release via Head-to-Tail Depolymerization of Hydrophobic Blocks or Branches
Source: MDPI journal article supplement (doi:10.3390/polym16081127), 2024-04-17
Supplement: s1 [file s1]

## **Supporting Information**

### **Impact of Copolymer Architecture on Demicellization and Cargo Release via Head-to-Tail Depolymerization of hydrophobic blocks or branches.**

**Christos Gioldasis<sup>1</sup>, Apostolos Gkamas<sup>1</sup> and Costas Vlahos<sup>1\*</sup>**

<sup>1</sup> Chemistry Department, University of Ioannina, 45110 Ioannina, Greece

**Table S1.** The number of encapsulated cargo molecules in micelles formed from mixtures containing 1000 linear or miktoarm copolymer chains with 2000 or 4000 cargo molecules  $C_3$ . The different interaction parameters between hydrophobic C-C and B-C beads correspond to  $T^*=1.8, 1.6$ , and  $1.4$ .  $[\Phi]=0.12$ .

|                                                                         | Total $C_3$ | encapsulated $C_3$ | Ratio |
|-------------------------------------------------------------------------|-------------|--------------------|-------|
| $A_{30}B_{30}$ , $T_B^* = 1.8$<br>$T_C^* = 1.8$ , $T_{B-C}^* = 1.8$     | 2000        | 816                | 0.408 |
| $A_{30}B_{30}$ , $T_B^* = 1.8$<br>$T_C^* = 1.6$ , $T_{B-C}^* = 1.8$     | 2000        | 841                | 0.421 |
| $A_{30}B_{30}$ , $T_B^* = 1.8$<br>$T_C^* = 1.5$ , $T_{B-C}^* = 1.8$     | 2000        | 860                | 0.430 |
| $A_{30}B_{30}$ , $T_B^* = 1.8$<br>$T_C^* = 1.4$ , $T_{B-C}^* = 1.8$     | 2000        | 863                | 0.432 |
| $A_{30}B_{30}$ , $T_B^* = 1.8$<br>$T_C^* = 1.4$ , $T_{B-C}^* = 1.4$     | 2000        | 1662               | 0.831 |
| $A_{30}(B_{15})_2$ , $T_B^* = 1.8$<br>$T_C^* = 1.4$ , $T_{B-C}^* = 1.4$ | 2000        | 1651               | 0.826 |
| $A_{30}(B_{10})_3$ , $T_B^* = 1.8$<br>$T_C^* = 1.4$ , $T_{B-C}^* = 1.4$ | 2000        | 1625               | 0.812 |
| $A_{30}B_{30}$ , $T_B^* = 1.8$<br>$T_C^* = 1.4$ , $T_{B-C}^* = 1.4$     | 4000        | 3284               | 0.821 |

**Table S2.** The preferential aggregation number ( $N_p$ ), the mean squared radius and gyration ( $\langle R_g^2 \rangle$ ), and the shape asymmetry parameter ( $\kappa^2$ ) of micelles formed by  $A_{30}B_{30}$ ,  $A_{30}(B_{15})_2$  and  $A_{30}(B_{10})_3$  copolymers, and from their mixtures with 2000  $C_3$  cargo molecules.

|                          | $N_p$ | $\langle R_g^2 \rangle$ | $\kappa^2$          |
|--------------------------|-------|-------------------------|---------------------|
| $A_{30}B_{30}$           | 44    | $115.5 \pm 0.2$         | $0.0162 \pm 0.0009$ |
| $A_{30}B_{30} + C_3$     | 51    | $126.8 \pm 0.3$         | $0.0126 \pm 0.0006$ |
| $A_{30}(B_{15})_2$       | 30    | $91.4 \pm 0.2$          | $0.031 \pm 0.001$   |
| $A_{30}(B_{15})_2 + C_3$ | 39    | $108.4 \pm 0.2$         | $0.025 \pm 0.001$   |
| $A_{30}(B_{10})_3$       | 23    | $82.1 \pm 0.3$          | $0.049 \pm 0.002$   |
| $A_{30}(B_{10})_3 + C_3$ | 31    | $97.9 \pm 0.4$          | $0.041 \pm 0.002$   |

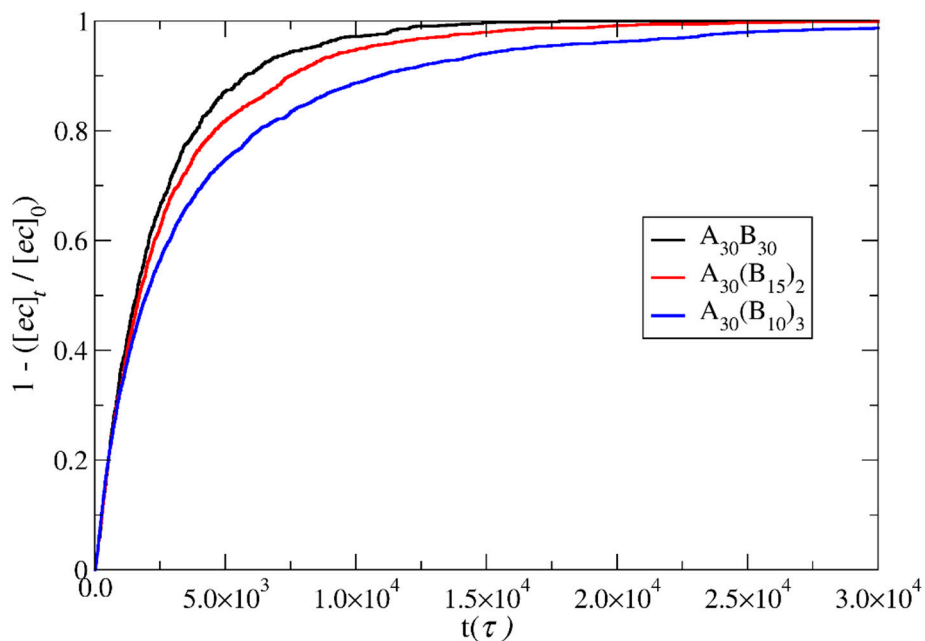

**Figure S1** Depolymerization fraction of end cap beads of  $A_{30}B_{30}$ ,  $A_{30}(B_{15})_2$ , and  $A_{30}(B_{10})_3$  copolymers as a function of time for constant trigger molecules concentration.  $RP_T=10^{-2}$ ,  $RP_B=10^{-3}$ .  $[ec]_0$  is the initial end cap beads concentration,  $[ec]_t$  is the end cap concentration.

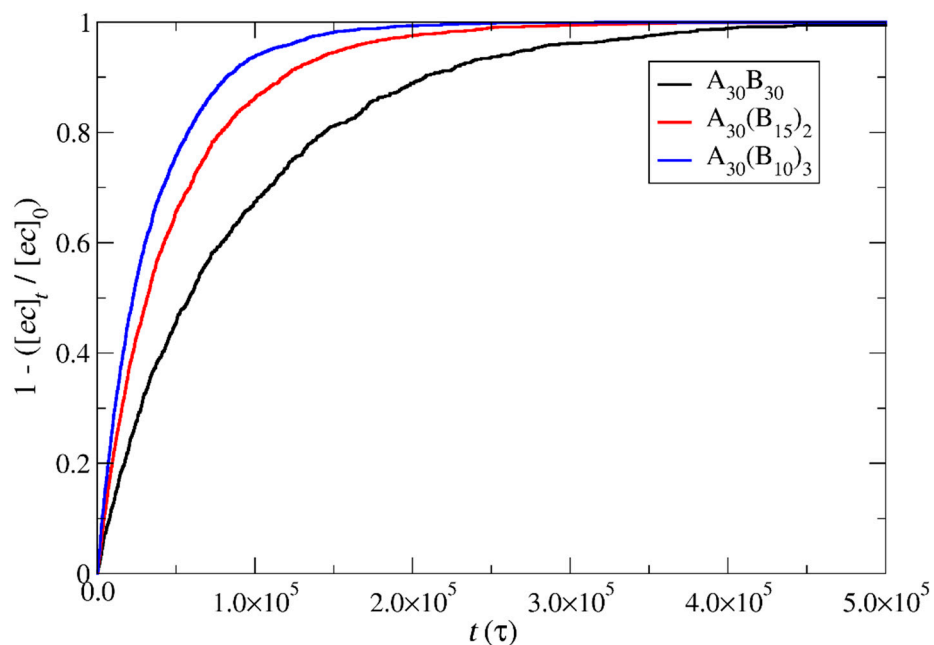

**Figure S2** Depolymerization fraction of end cap (ec) beads of  $A_{30}B_{30}$ ,  $A_{30}(B_{15})_2$ , and  $A_{30}(B_{10})_3$  copolymers as a function of time for 10 times the stoichiometric trigger molecules

concentration.  $RP_T=10^{-4}$ ,  $RP_B=10^{-3}$ .  $[ec]_0$  is the initial end cap beads concentration,  $[ec]_t$  is the end cap concentration.

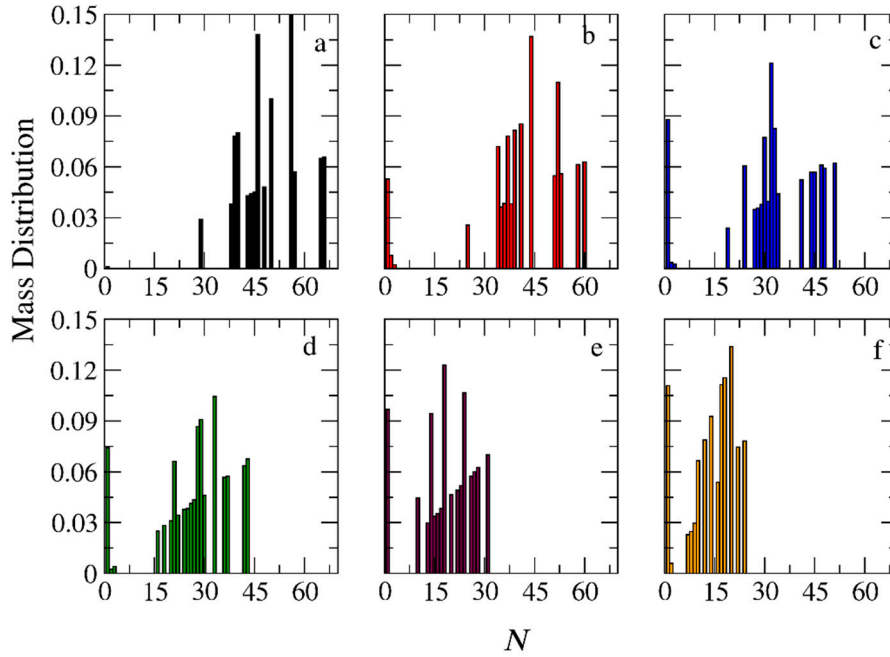

**Figure S3** Mass distribution of micelles formed by linear  $A_{30}B_{30}$  copolymers across various time points and depolymerization fractions of all hydrophobic beads: a)  $t=0$ , 0, b)  $t=9100\tau$ , 0.17, c)  $t=13500\tau$ , 0.32, d)  $t=18000\tau$ , 0.44, e)  $t=27000\tau$ , 0.61, f)  $t=36500\tau$ , 0.74. The trigger molecule concentration is maintained constant in all cases.  $RP_T=RP_B=10^{-3}$ .

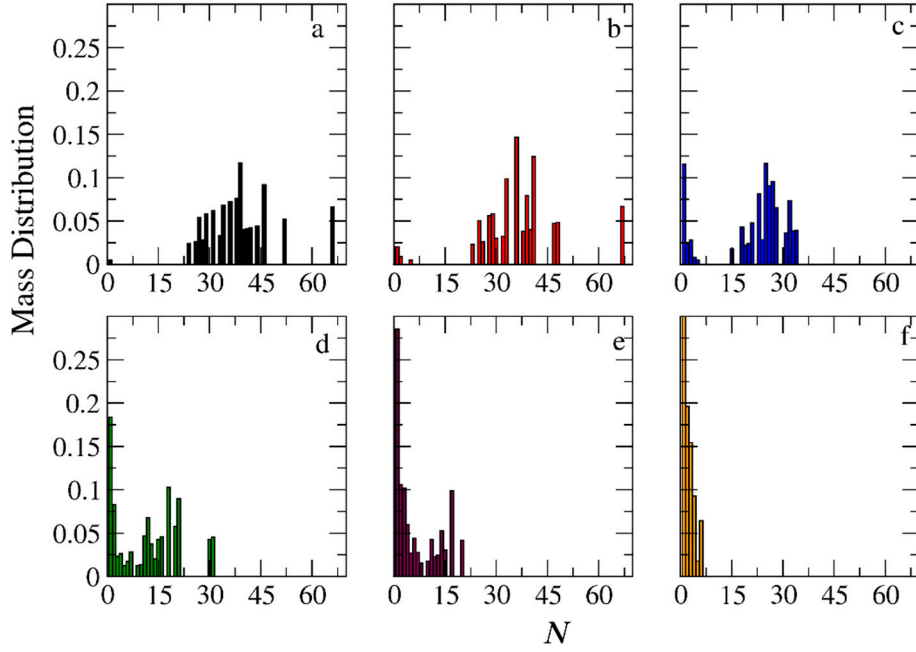

**Figure S4** Mass distribution of micelles formed by miktoarm  $A_{30}(B_{15})_2$  copolymers across various time points and depolymerization fractions of all hydrophobic beads: a)  $t=0$ , 0, b)  $t=4500\tau$ , 0.10, c)  $t=9000\tau$ , 0.24, d)  $t=18000\tau$ , 0.45, e)  $t=27000\tau$ , 0.59, f)  $t=45000\tau$ , 0.76. The trigger molecule concentration is maintained constant in all cases.  $RP_T = RP_B = 10^{-3}$ .

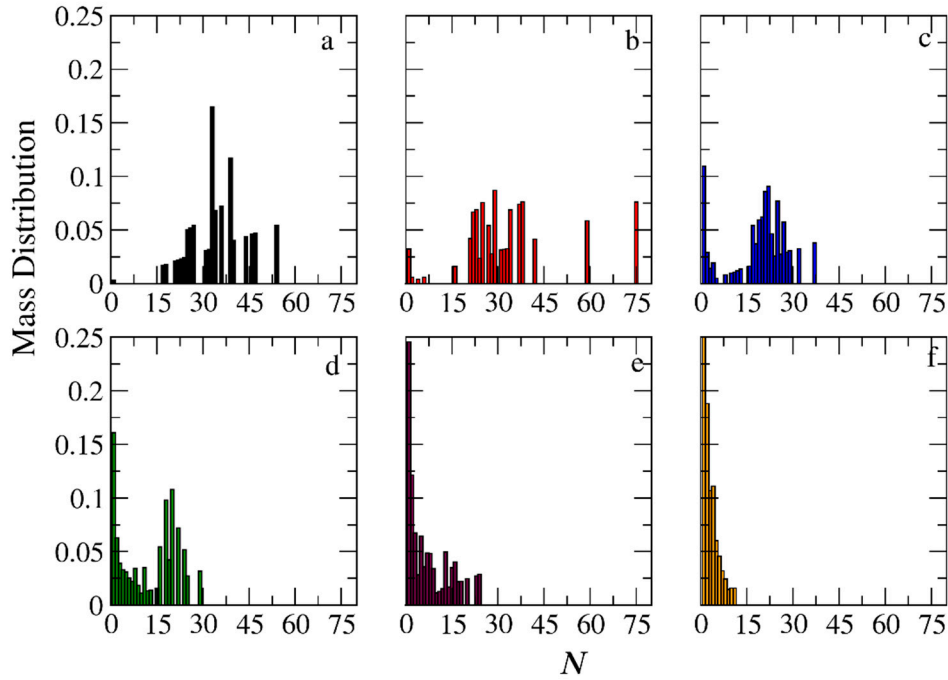

**Figure S5** Mass distribution of micelles formed by miktoarm  $A_{30}(B_{10})_3$  copolymers across various time points and depolymerization fractions of all hydrophobic beads: a)  $t=0$ , 0, b)

$t=4500\tau$ , 0.11, c)  $t=13500\tau$ , 0.34, d)  $t=22500\tau$ , 0.49, e)  $t=36000\tau$ , 0.63, f)  $t=63000\tau$ , 0.76. The trigger molecule concentration is maintained constant in all cases.  $RP_T=RP_B=10^{-3}$

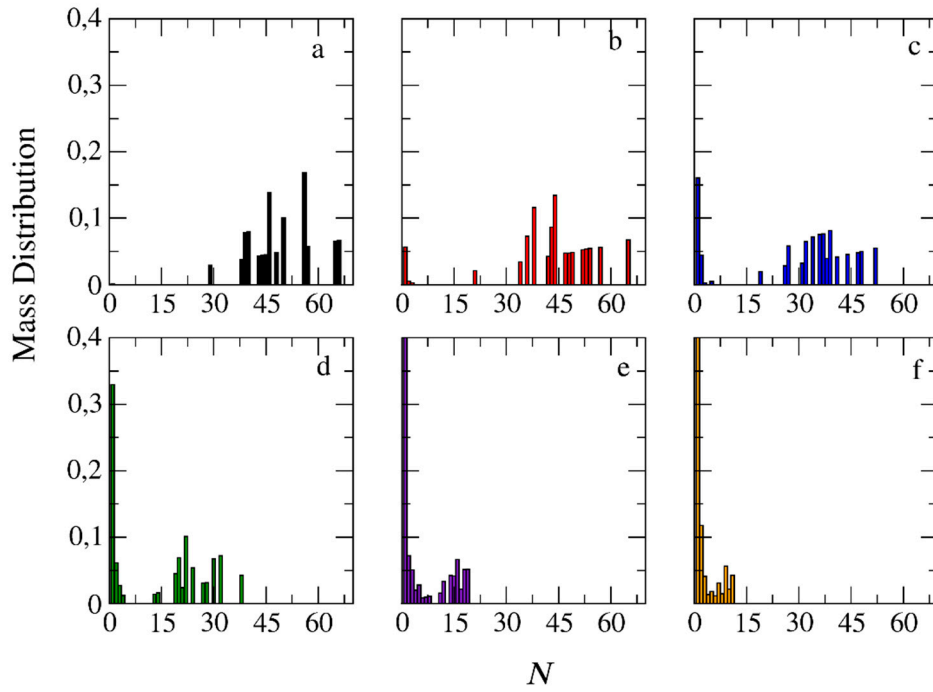

**Figure S6** Mass distribution of micelles formed by linear  $A_{30}B_{30}$  copolymers across various time points and depolymerization fractions of all hydrophobic beads: a)  $t=0$ , 0, b)  $t=4500\tau$ , 0.27, c)  $t=6000\tau$ , 0.41, d)  $t=7500\tau$ , 0.55, e)  $t=9000\tau$ , 0.68, f)  $t=10500\tau$ , 0.80. The trigger molecule concentration is maintained constant in all cases.  $RP_T=10^{-2}$  and  $RP_B=10^{-3}$ .

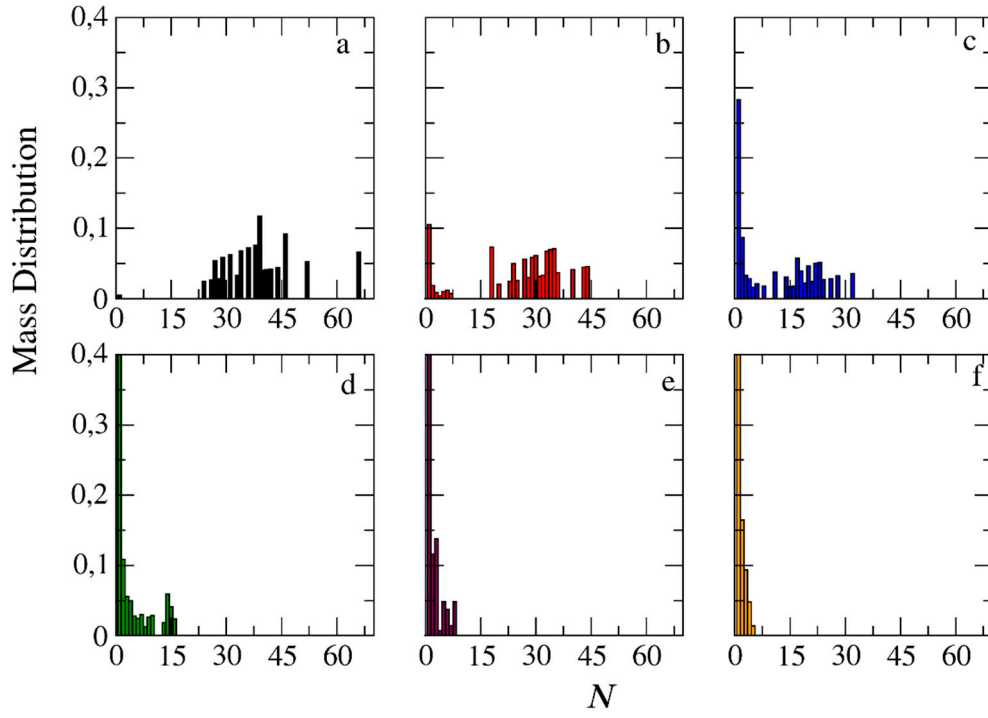

**Figure S7** Mass distribution of micelles formed by miktoarm  $A_{30}(B_{15})_2$  copolymers across various time points and depolymerization fractions of all hydrophobic beads: a)  $t=0$ , 0, b)  $t=3000\tau$ , 0.30, c)  $t=4000\tau$ , 0.45, d)  $t=6000\tau$ , 0.67, e)  $t=7500\tau$ , 0.78, f)  $t=9000\tau$ , 0.86. The trigger molecule concentration is maintained constant in all cases.  $RP_T=10^{-2}$  and  $RP_B=10^{-3}$ .

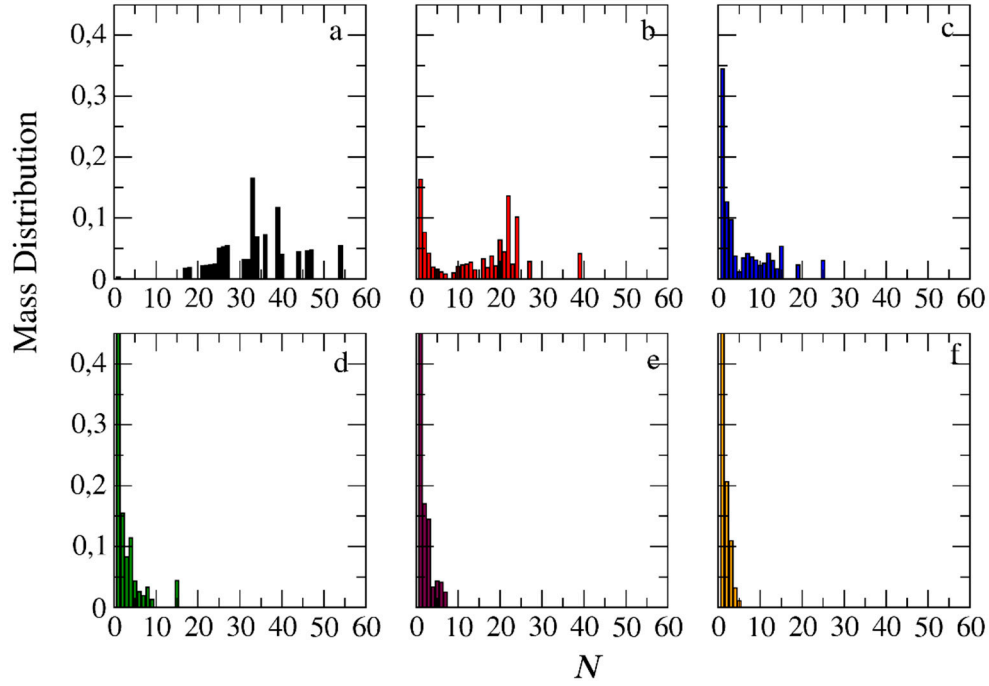

**Figure S8** Mass distribution of micelles formed by miktoarm  $A_{30}(B_{10})_3$  copolymers across various time points and depolymerization fractions of all hydrophobic beads: a)  $t=0$ , 0, b)  $t=3000\tau$ , 0.37, c)  $t=4500\tau$ , 0.56, d)  $t=6000\tau$ , 0.68, e)  $t=7500\tau$ , 0.74, f)  $t=9000\tau$ , 0.80. The trigger molecule concentration is maintained constant in all cases.  $RP_T=10^{-2}$  and  $RP_B=10^{-3}$ .

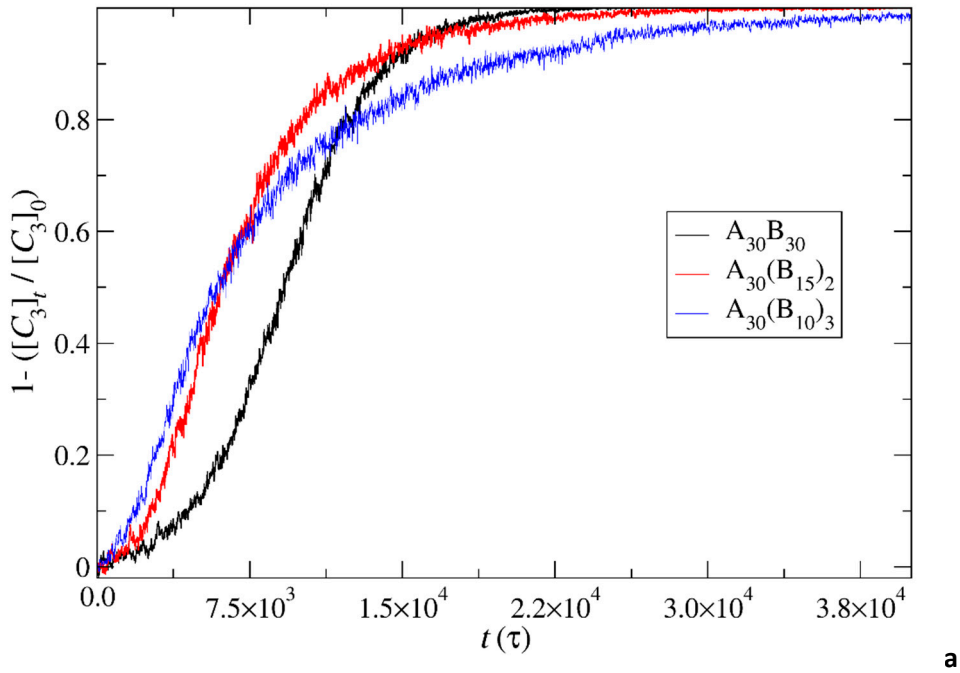



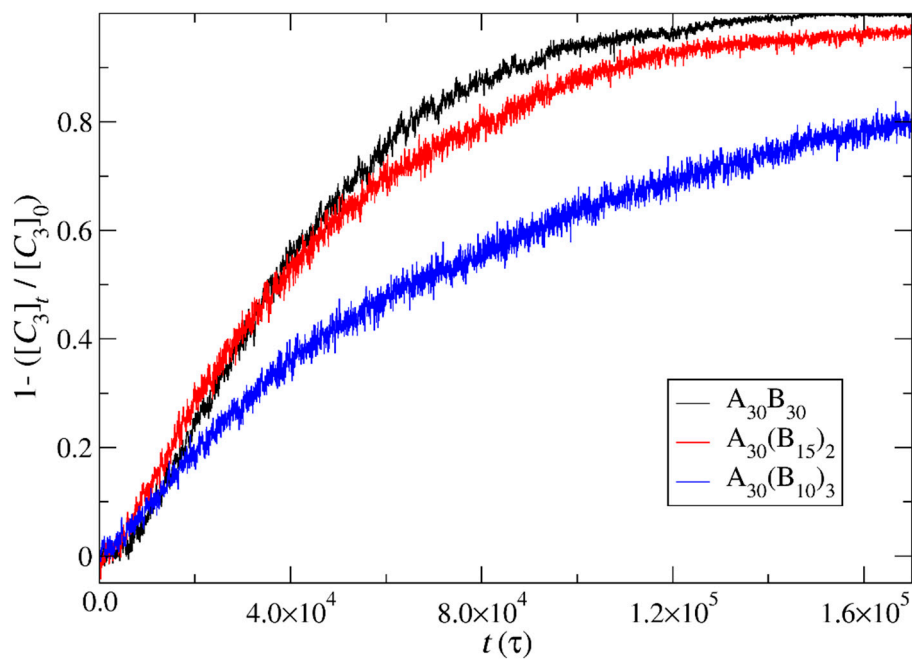

**b**

**Figure S9** Cargo molecules release fraction from  $A_{30}B_{30}$ ,  $A_{30}(B_{15})_2$ , and  $A_{30}(B_{10})_3$  copolymer mixtures plotted against time for constant trigger molecule concentration. a)  $RP_T=10^{-2}$ ,  $RP_B=10^{-3}$  and b)  $RP_T=10^{-3}$  and  $RP_B=10^{-3}$ .  $[C_3]_0$  is the initial cargo molecules concentration,  $[C_3]_t$  is the cargo molecules concentration.

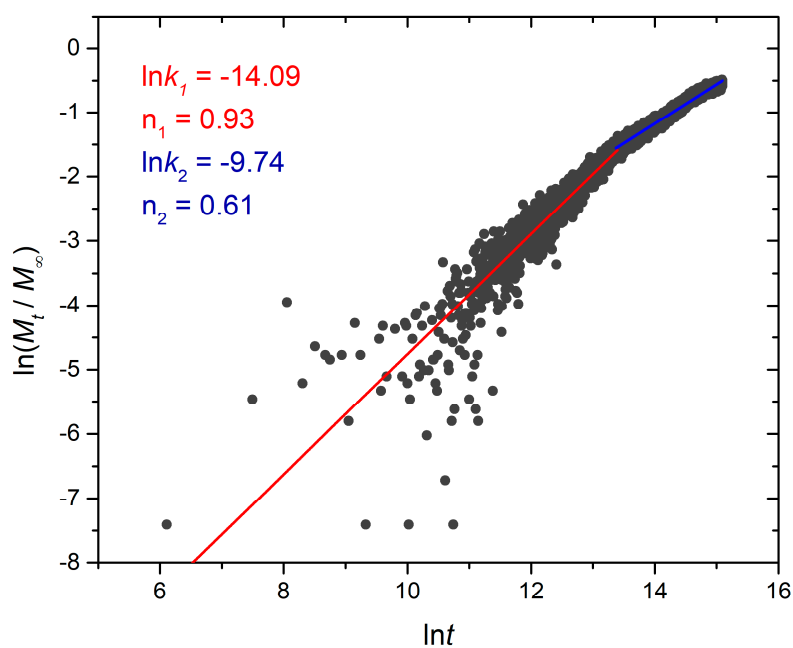

**a**

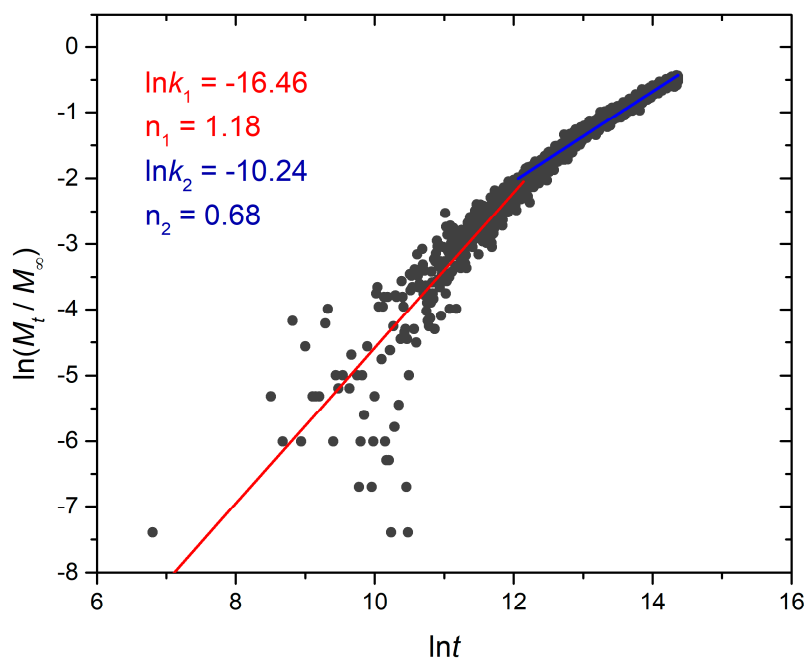

**b**

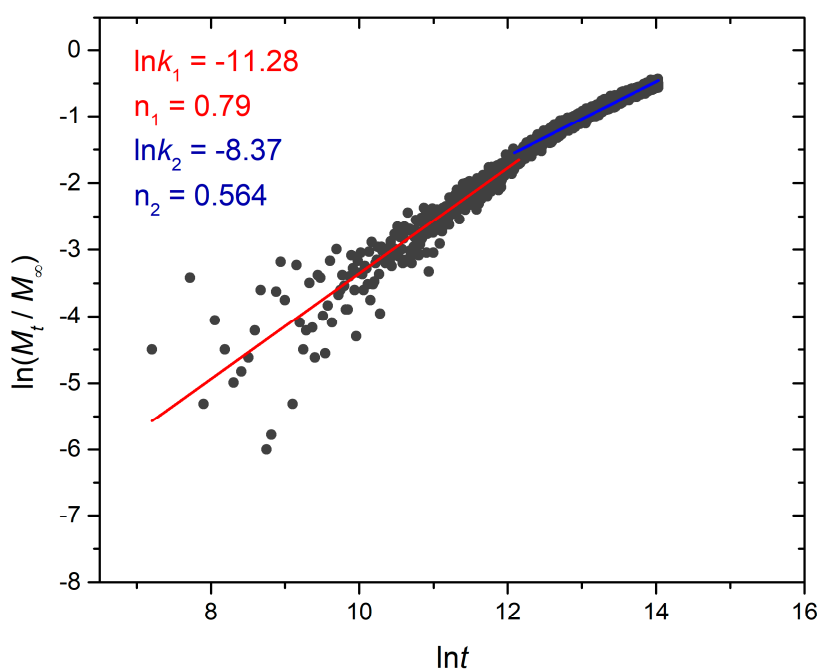

**c**

**Figure S10** Plot depicting the fraction of released cargo molecules against time for a) linear A<sub>30</sub>B<sub>30</sub>, b) miktoarm A<sub>30</sub>(B<sub>15</sub>)<sub>2</sub>, and c) miktoarm A<sub>30</sub>(B<sub>10</sub>)<sub>3</sub> copolymers. Fitting lines,  $k$  and  $n$

correspond to the Kormsmeier-Peppas equation. Trigger molecule concentration is maintained stoichiometric to end cap beads in all cases.  $RP_T=10^{-4}$  and  $RP_B=10^{-3}$ .

## Radius of Gyration

The radii of gyration used to describe the dimensions of a polymeric micelle  $\langle R_g^2 \rangle_{micelle}$  and the micelle's core  $\langle R_g^2 \rangle_{core}$  are defined as:

$$\langle R_g^2 \rangle_{micelle} = \frac{1}{M} \sum_{i=1}^M (\mathbf{r}_i - \mathbf{r}_{CM})^2 \quad (S1)$$

$$\langle R_g^2 \rangle_{core} = \frac{1}{M_c} \sum_{i=1}^{M_c} (\mathbf{r}_i - \mathbf{r}_{coreCM})^2 \quad (S2)$$

where,  $M_c$  represents the number of B-type beads forming the micelle core, and  $M$  denotes the total number of beads (both A-type and B-type) forming the micelle.  $\mathbf{r}$ ,  $\mathbf{r}_{CM}$ , and  $\mathbf{r}_{coreCM}$  denote the position vectors of  $i$  bead, the center of mass of B-type beads, and the center of mass of all beads forming the micelle, respectively.

## Shape anisotropy parameter.

The shape anisotropy  $\kappa^2$  is defined as(Theodorou & Suter, 1985):

$$\kappa^2 = 1 - 3 \frac{\langle I_2 \rangle}{\langle I_1^2 \rangle}, \quad (S3)$$

where  $I_1$  and  $I_2$  are the first and second invariants of the radius of gyration tensor.  $\kappa^2 = 0$  corresponds to a perfect sphere while  $\kappa^2 = 1$  to a perfect rod. The relationship between the packing parameter and the shape anisotropy parameter in polymers is not a direct one, but they are both influenced by molecular structure and interactions. In some cases, molecules with high shape anisotropy (high  $\kappa^2$ ) may have difficulty packing efficiently, especially in self-assembly processes where spherical structures are favored. Conversely, molecules with low shape

anisotropy (low  $\kappa^2$ ) may have a higher tendency to pack efficiently. However, this relationship can vary depending on the specific molecular interactions and the overall system conditions.

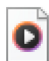

SV1.mp4

**Video S1.** A preview of simulation box showing the depolymerization of hydrophobic (red) beads in A<sub>30</sub>B<sub>30</sub> copolymer mixtures for constant trigger molecule concentration is presented ( $RP_T=10^{-4}$ ,  $RP_B=10^{-3}$ ). Cargo molecules are shown in green. For clarity all other types of beads are hidden.

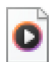

SV2.mp4

**Video S2.** A preview of simulation box showing the release of cargo molecules (green) in A<sub>30</sub>B<sub>30</sub> copolymer mixtures for constant trigger molecule concentration is presented ( $RP_T=10^{-4}$ ,  $RP_B=10^{-3}$ ). For clarity all other types of beads are hidden.
